# Supplementary material for: Hole doping at Sn sublattice of the buckled honeycomb SnX (X = S and Se) monolayer: an efficient functionalization approach
Source: Royal Society of Chemistry journal article supplement (doi:10.1039/d3ma01032e), 2024-01-01
Supplement: d3ma01032e1.pdf [file d3ma01032e1.pdf]

## Hole doping at Sn sublattice of the buckled honeycomb SnX (X = S and Se) monolayer: An efficient functionalization approach

D. M. Hoat<sup>1,2,\*</sup> and J. Guerrero-Sanchez<sup>3</sup>

<sup>1</sup>Institute of Theoretical and Applied Research, Duy Tan University, Ha Noi 100000, Viet Nam

<sup>2</sup>Faculty of Natural Sciences, Duy Tan University, Da Nang 550000, Viet Nam

<sup>3</sup>Universidad Nacional Autónoma de México, Centro de Nanociencias y Nanotecnología, Apartado Postal 14, Ensenada, Baja California, Código Postal 22800, Mexico

\*Corresponding author: [dominhhoat@duytan.edu.vn](mailto:dominhhoat@duytan.edu.vn)

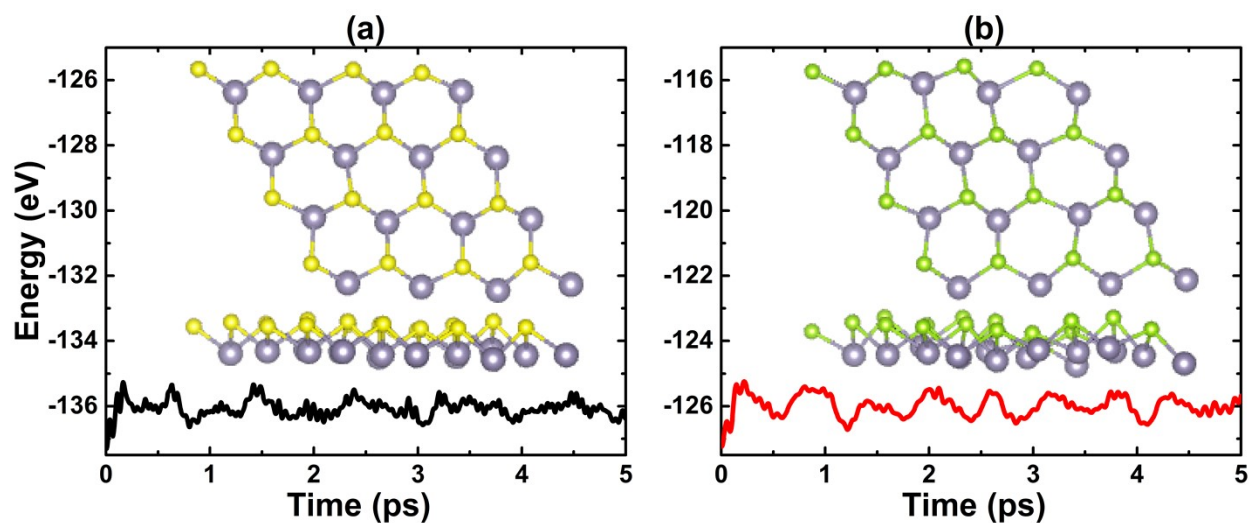

Figure S1: AIMD simulations (Energy fluctuations) at 300 K of (a) SnS and (b) SnSe monolayer (Inset: Atomic structure after 5 ps of simulations).

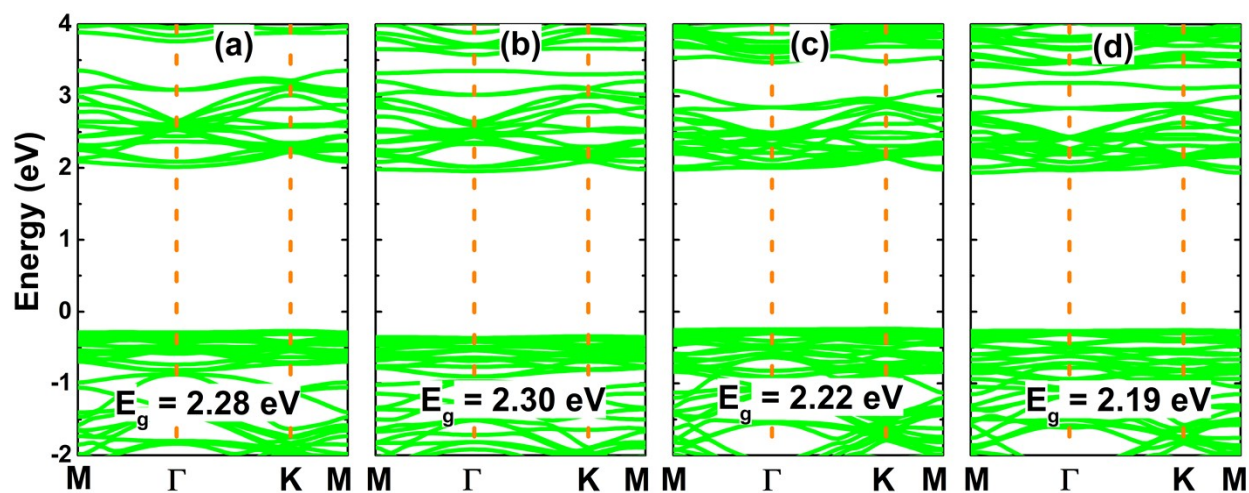

Figure S2: Electronic band structure (The Fermi level is set to 0 eV) of SnS monolayer doped with (a) Mg and (b) Ca, and SnSe monolayer doped with (c) Mg and (d) Ca.
